# Supplementary material for: Fire risk modulation by long-term dynamics in land cover and dominant forest type in Eastern and Central Europe
Source: Copernicus journal article supplement (doi:10.5194/bg-2019-260), 2019-08-13
Supplement: Supplementary file 1 [file Suplement S1_Metadata_201906.xls]

## Sheet: Meta_2017_09_09.csv
Site_Name	Latitude	Longitude	Elevation m a.s.l.	Country	Ecoregions (Metzger, 2005)	Site type	Micro / macrocharcoal	Continuous counts (Y=yes, N=no)	Age depth model	Charcoal data provided by	Publication
Ahlequellmoor	51.73	9.5094	300	Germany	ATL	bog	micro	N	this study, CLAM, smoothed spline model	S. Jahns	Jahns S. 2005. Vegetation History and Archaeobotany 15: 57-63
Antu Sinijarv	59.0625	26.24	95	Estonia	BNE	lake	micro	N	this study, OxCal 4.2.4, IntCal13	S. Veski	Sohar K, Kalm V. 2008. A 12.8-ka-long palaeoenvironmental record revealed by subfossil ostracod data from lacustrine freshwater tufa in Lake Sinijärv, northern Estonia. Journal of Paleolimnolology 40:809–821
Apsuciems	57.05	23.3189	5	Latvia	BNE	bog	macro	N	original, OxCal, Bayesian modelling, IntCal13	M. Galka	Galka et al. 2016. Development of Rich Fen on the SE Baltic Coast, Latvia, during the Last 7500 Years, Using Paleoecological Proxies: Implications for Plant Community Development and Paleoclimatic Research Wetlands 36: 689-703
Bagno Serebryskie	51.18	23.5261	173	Poland	CON	bog	macro	N	original, OxCal, Bayesian modelling	M. Galka	Galka et al. 2017. Rich fen development in CE Europe, resilience to climate change and human impact over the last ca. 3500 years. Palaeogeography, Palaeoclimatology, Palaeoecology 473: 57–72
Bartoliget	47.75	22.5	130	Hungary	CON	bog	micro	N	original, GCDv3	CGDv3	http://www.paleofire.org/index.php?p=CDA/index&gcd_menu=CDA
Belauer See	54.1	10.2533	26	Germany	ATL	lake	micro	N	original, varve chronology, 14C dates, 210P/Cs, tephra	I. Freeser	Wiethold, J. 1998. Studien zur jüngeren postglazialen Vegetations- und Siedlungsgeschichte im östlichen Schleswig-Holstein (mit einem Beitrag von H. Erlenkeuser). Universitätsforschungen zur prähistorischen Archäologie 45, 365. Dörfler et al 2012. A high-quality annually laminated sequence from Lake Belau, Northern Germany: Revised chronology and its implications for palynological and tephrochro…
BeliyaKanton2	41.73	24.146	1547	Bulgaria	CON	bog	macro	N	this study, OxCal, linear interpolation	E. Marinova	Marinova E, unpublished
Bielice	48.63	18.3438	186	Czechia /Slovakia	CON	bog	micro	N	original, OxCal, linear interpolation	E. Jamrichova	Hajkova et al. 2013. Holocene history of Cladium mariscum dominanted calcareous fen: vegetation stability and landscape development. Preslia 85: 317- 332.
Birzulis	55.78	22.4369	148	Lithuania	BNE	bog	micro	N	this study, CLAM, smoothed spline model	M. Stancikaite	Stancikaite M. 2006. Human response to the Holocene environmental changes in the Bir≈æulis Lake region, NW Lithuania. Quaternary international 150:113-129
Bogdanówka	49.75	19.7944	675	Ucraine	CON	bog	micro	N	original, OxCal, Bayesian modelling	P. Kolaczek	Kolaczek et al. 2017. Five centuries of the Early Holocene forest development and its interactions with palaeoecosystem of small landslide lake in the Beskid Makowski Mountains (Western Carpathians, Poland) — High resolution multi-proxy study. Review of Palynology and Palaeobotany 244: 113-127
Breclav	48.77	16.8755	160	Czechia /Slovakia	CON	bog	micro	N	original, OxCal, linear interpolation	E. Jamrichova	Jamrichova E, unpubl.
Bruckmisse 1	48.73	8.644	670	Germany	ATL	bog	micro	N	EPD, CLAM, smoothed slpine, Giesecke et al. (2014)	M. Rösch / EPD	Rösch et al. 2005. Frühe Waldnutzung und das Alter des Naturwaldes im Schwarzwald. AFZ Der Wald 12: 636-638.
Bruckmisse 3	48.73	8.644	670	Germany	ATL	bog	micro	N	EPD, CLAM, smoothed spline, Giesecke et al. (2014)	M. Rösch / EPD	Rösch et al. 2005. Frühe Waldnutzung und das Alter des Naturwaldes im Schwarzwald. AFZ Der Wald 12: 636-638.
Bruckmisse 4	48.73	8.644	670	Germany	ATL	bog	micro	N	EPD, CLAM, smoothed spline, Giesecke et al. (2014)	M. Rösch / EPD	Rösch et al. 2005. Frühe Waldnutzung und das Alter des Naturwaldes im Schwarzwald. AFZ Der Wald 12: 636-638.
Buchsee	47.88	9.5731	576	Germany	ATL	lake	micro	N	EPD, CLAM, smoothed spline, Giesecke et al. (2014)	M. Rösch	Rösch et al. 2005. Frühe Waldnutzung und das Alter des Naturwaldes im Schwarzwald. AFZ Der Wald 12: 636-638.
Buhaiescu_Mare	47.57	23.6433	1918	Romania	CON	lake	macro	N	original, CLAM, smoothed spline	A. Feurdean	Geanta et al. 2014. High mountain region of the Northern Romanian Carpathians responded sensitively to Holocene climate and land use changes: A multi-proxy analysis. Holocene 24:944-956
Calineasa	46.56	22.8168	1300	Romania	CON	bog	macro	N	original, CLAM, linear interpolation	A. Feurdean	Feurdean et al. 2009. Legacy of the past land use changes and management on the ‘natural’ upland forests composition in the Apuseni Natural Park, Romania. The Holocene 19: 1–15.
Cepicko polje	45.19	14.1591	27	Croatia	CON	lake	micro	N	this study, Psimpoll, smoothed spline	M. Andric	Balbo et al. 2006. Palaeoenvironmental and archaeological implications of a sediment core from Polje, Istria, Croatia, Geologia Croatica 59: 107-122.
Cepkeliai	54.01	24.617	131	Lithuania	BNE	bog /lake	micro	N	this study, CLAM, smoothed spline	M. Stancikaite	Stancikaite M, unpublished
Crveni potok macro	43.91	19.42	1060	Serbia	CON	bog	macro	Y	original, CLAM, smoothed spline model	W. Finsinger	Finsinger et al. 2017. Holocene vegetation and fire dynamics at Crveni Potok, a small mire in the Dinaric Alps (Tara National Park, Serbia). Quaternary Science Reviews 167: 63-77
Crveni potok micro	43.91	19.42	1060	Serbia	CON	bog	micro	N	original, CLAM, smoothed spline model	W. Finsinger	Finsinger et al. 2017.Holocene vegetation and fire dynamics at Crveni Potok, a small mire in the Dinaric Alps (Tara National Park, Serbia). Quaternary Science Reviews 167: 63-77
Cvitova	49.22	24.4682	288	Ukraine	CON	bog	micro	N	original, OxCal, Bayesian modelling	P. Kołaczek & M. Karpińska-Kołaczek	Kolaczek et al. 2016. Interplay of climate–human–vegetation on the northeastern edge of the Carpathians (Western Ukraine) between 7500 and 3500 calibrated years BP. Biological Journal of Linnean Society 119: 609-629
Dastin	49.02	18.5598	441	Czechia /Slovakia	CON	bog	micro	Y	original, OxCal, linear interpolation	E. Jamrichová	Jamrichová et al. Folia Geobotania (under revision)
DubravaMS15	48.87	17.0983	227	Czechia /Slovakia	CON	bog	micro	Y	original, OxCal, linear interpolation	E. Jamrichová	Jamrichová et al. 2017. Human impact on open temperate woodlands during the middle Holocene in Central Europe. Review of Palynology and Palaeobotany 245: 55-68.
Durchenbergried	47.78	8.9833	432	Germany	ATL	bog/fen/lake	micro	N	original, OxCal, linear interpolation	M. Rösch	Rösch M. 1990. Vegetationsgeschichtliche Untersuchungen im Durchenbergried. In: Siedlungsarchäologie im Alpenvorland 2, Forsch. u. Ber. z. Vor u. Frühgeschichte Bad. Württ. 37 (Stuttgart 1990), 9 56.
Durnoye	55.09	40.8939	118	Russia	BNE	bog	micro	N	original, CLAM, linear interpolation	E. Novenko	Novenko et al. 2016. Mid- and late holocene vegetation dynamics and fire history in the boreal forest of european russia: A case study from meshchera lowlands. Palaeogeography, Palaeoclimatology, Palaeoecology, 459:570–584.
Gąsak II	52.46	19.3913	81	Poland	CON	bog	micro	N	this study, CLAM, smoothed spline model	A. Wacnik	Wacnik et al. 2011. Late Glacial and Holocene history of vegetation in Gostynin area, central Poland. Acta Palaeobotanica 51: 249–278.
Ginkunai	55.95	23.3386	107	Lithuania	BNE	lake	micro	N	this study, CLAM, smoothed spline model	M. Stancikaite	Stančikaitė et al. 2015. Lateglacial and early Holocene environmental dynamics in northern Lithuania : a multi-proxy record from Ginkūnai Lake. Quaternary international, 367: 44–57.
Gołębiewo I	54.45	18.5	130	Poland	CON	bog	micro	N	this study, CLAM, smoothed spline model	A. Pędziszewska	Latałowa et al. 2013. Tilia forest dynamics, Kretzschmaria deusta attack, and mire hydrology as palaeoecological proxies for mid-Holocene climate reconstruction in the Kashubian Lake District (N Poland). The Holocene 23: 667-677.
Gorenje jezero	45.74	14.4083	550	Slovenia	CON	bog	micro	N	this study, Psimpoll, linear interpolation	M. Andric	Andric M., Willis K. J. 2003. The phytogeographical regions of Slovenia: a consequence of natural environmental variation or prehistoric human activity? Journal of Ecology 91: 807-821.
Griblje	45.57	15.0257	160	Slovenia	CON	bog	micro	N	this study, Psimpoll, linear interpolation	M. Andric	Andric M. 2011. In: B. Toskan (ed.). Drobci ledenodobnega okolja /Fragments of Ice Age Environments, Opera Instituti Archaeologici Sloveniae 21, Ljubljana, Zalozba ZRC, 235-249.
Gropile	47.58	24.6271	1920	Romania	CON	bog	macro	Y	original, CLAM, smoothed spline model	G. Florescu	Florescu et al., in press. Exploring the influence of local controls on fire activity using multiple charcoal records from northern Romanian Carpathians. Quaternary International
Grosser Krebssee	52.85	14.0993	5	Germany	CON	lake	micro	N	this study, CLAM, smoothed spline model	S. Jahns	Jahns S. 2000, Veget. Hist. Achaeo; S. Jahns, 1999. GERMANIA, 77, 639-661.
Herrenwiesser 1	48.67	8.2964	830	Germany	ATL	dystrophioc cirque lake	micro	N	EPD, CLAM, Giesecke et al. (2014)	M. Rösch / EPD	Rösch M. 2012. Vegetation und Waldnutzung im Nordschwarzwald w√§hrend sechs Jahrtausenden anhand von Profundalkernen aus dem Herrenwieser See. Standort.wald 47:43-64.
Herrenwiesser 2	48.67	8.2964	830	Germany	ATL	dystrophioc cirque lake	micro	N	EPD, CLAM, Giesecke et al. (2014)	M. Rösch / EPD	Rösch M. 2012. Vegetation und Waldnutzung im Nordschwarzwald w√§hrend sechs Jahrtausenden anhand von Profundalkernen aus dem Herrenwieser See. Standort.wald 47:43-64.
Holbicky	48.51	17.1092	183	Czechia /Slovakia	CON	bog	micro	N	original, OxCal, linear interpolation	E. Jamrichova	Jamrichova E, unpubl.
Hornstaad	47.7	9.0167	385	Germany	ATL	bog	micro	N	EPD, CLAM, Giesecke et al. (2014)	M. Rösch	Rösch, M. 1992. Human impact as registered in the pollen record: some results from the western Lake Constance region, Southern Germany. Vegetation History and Archaeobotany 1:101-109. Rösch, M. 1993. Prehistoric land use as recorded in a lake- shore core at Lake Constance. Vegetation History and Archaeobotany 2:213 -23
Hovorany	48.95	17.0575	246	Czechia /Slovakia	CON	bog	micro	N	original, OxCal, linear interpolation	E. Jamrichová	Jamrichova E, unpubl.
Hute_pod_Smrkem	49.47	18.4185	533	Czechia /Slovakia	CON	bog	micro	N	original, OxCal, linear interpolation	E. Jamrichová	Jamrichova, E unpubl.
Huzenbacher 1	48.57	8.3481	747	Germany	ATL	dystrophioc cirque lake	micro	N	CLAM, Giesecke et al. (2014)	M. Rösch / EPD	Rösch, M., G. Tserendorj. 2011.Der Nordschwarzwald - früher besiedelt als gedacht? Pollenprofile belegen ausgedehnte vorgeschichtliche Besiedlung und Landnutzung. Denkmalpflege in Baden-W√ºrttemberg 40:66-73.
Huzenbacher 2	48.57	8.3481	747	Germany	ATL	dystrophioc cirque lake	micro	N	CLAM, Giesecke et al. (2014)	M. Rösch / EPD	Rösch, M., and G. Tserendorj. 2011 b: Florengeschichtliche Beobachtungen im Nordschwarzwald (S√ºdwestdeutschland). Hercynia N.F. 44:53-71.
Iezerul_Sadovei	47.6	25.4494	930	Romania	CON	lake	macro	N	original, CLAM, smoothed spline model	G. Florescu	Florescu G. 2017. Last 1000 years of environmental history in Southern Bucovina, Romania: a high resolution multi-proxy lacustrine archive. Palaeogeography, Palaeoclimatololgy Palaeoecololgy 473: 26–40.
Jagniecy_Potok	50.85	15.36	850	Poland	CON	bog	macro	Y	original, OxCal, Bayesian modelling	K Kajukalo	Kajukalo et al. 2016. Abrupt ecological changes in the last 800 years inferred from a mountainous bog using testate amoebae traits and multi-proxy data, European Journal of Protistology, 55: 165-180
Lake Biale	52.5	19.495	72	Poland	CON	lake	micro	N	this study, CLAM, smoothed spline	A. Wacnik	Wacnik et al. 2011. Late Glacial and Holocene history of vegetation in Gostynin area, central Poland. Acta Palaeobotanica 51: 249–278.
Juodonys	55.74	25.4	20	Lithuania	BNE	bog	micro	N	this study, CLAM, smoothed spline model	M. Stancikaite	Stančikaitė M., Kisielienė D., Strimaitienė A. 2004. Vegetation response to the climatic and human impact changes during the Late Glacial and Holocene : case study of the marginal area of Baltija Upland, NE Lithuania. Baltica, 17 : 17–33.
Kahala bog	59.49	25.512	35	Estonia	BNE	bog	micro	N	this study, OxCal 4.2.4, IntCal13	S. Veski	Poska, A., Saarse, L. 1999. Vegetation History and Archaeobotany 8: 185-197.
Kiss Mohos	48.4	20.4	310	Hungary	CON	bog	micro	N	original, Psimpoll /Linear interpolation	CGDv3	http://www.paleofire.org/index.php?p=CDA/index&gcd_menu=CDA
Klukvennoye	54.78	43.4466	171	Russia	BNE	bog	micro	N	original, CLAM, linear interpolation	N. Elena	Novenko et al. 2017. Vegetation dynamics and fire history at the southern boundary of the forest vegetation zone in european russia during the middle and late holocene. Holocene
Kumata	42.35	23.15	1770	Bulgaria	CON	bog	micro	N	original, Tilia, linear interpolation	S.Tonkov	Tonkov, S., Possnert, G. 2016. A new late Holocene pollen diagram from Vitosha Mountain. Vegetation history and anthropogenic impact. Comptes rendus de l'Academie bulgare des Sciences,Tome 69: 327-336.
Kusowskie Bagno	53.81	16.5872	143	Poland	CON	bog	micro	N	original, OxCal, Bayesian modelling	M. Obremska	Lamentowicz et al. 2015. Reconstructing climate change and ombrotrophic bog development during the last 4000 years in northern Poland using biotic proxies, stable isotopes and trait-based approach. Palaeogeography, Palaeoclimatology, Palaeoecology 418: 261-277.
Lake Bled	46.37	14.1	475	Slovenia	CON	lake	micro	N	original, OxCal Bayesian modeling	M. Andric	Andric et al. 2009. A multi-proxy Late-glacial palaeoenvironmental record from Lake Bled, Slovenia, Hydrobiologia 631, 121-141. Lane C. S., et al. 2014. The occurence of distal Icelandic and Italian tephra in the Lateglacial of Lake Bled, Slovenia, Quaternary Science Reviews 30: 1013-1018.
Lake Czarne	54.37	17.8103	147	Poland	CON	lake	micro	N	this study, CLAM, smoothed spline model	J. Święta-Musznicka	PhD-thesis Joanna Święta-Musznicka, Gdańsk, 2005 unpublished
Lake Czarne bog	54.3	22.0592	147	Poland	BNE	bog /fen/lake	micro	N	original, OxCal, Bayesian modelling	M. Karpińska-Kołaczek / P. Kołaczek	Karpińska-Kołaczek et al. 2014. Quaternary International 328: 196-212.
Lake Kahala	59.49	25.5324	33	Estonia	BNE	lake	micro	N	this study, OxCal 4.2.4, IntCal13	S. Veski	Poska, A., Saarse, L.1999. Holocene vegetation and land-use history in the environs of Lake Kahala, northern Estonia. Vegetation History and Archaeobotany 8: 185-197.
Lake Kojle	54.02	22.88	149	Poland	BNE	bog	macro	N	original, OxCal, linear interpolation	M. Obremska	Galka et al., in prep.
Lake Lasva	57.86	27.1745	72	Estonia	BNE	lake	micro	N	this study, OxCal 4.2.4, IntCal13	S. Veski	Niinemets, E., Saarse, L. 2007a. Fine-resolution pollen-based evidences of farming and forest development, south-eastern Estonia. Polish Journal of Ecology 55: 283-296.
Lake Plaani	57.68	27.076	244	Estonia	BNE	lake	macro	N	this study, OxCal 4.2.4, IntCal13	S. Veski	Niinemets, E., Saarse, L 2007. Rev Palaeobotany and Palynology 146:51-73.	no
Lake Ruila	59.17	24.4322	42	Estonia	BNE	lake	micro	N	this study, OxCal 4.2.4, IntCal13	S. Veski	Niinemets, E., Saarse, L. 2007b. Mid- and late-Holocene land-use changes inferred from pollen records, in a south-eastern Estonian upland area. Review of Palaeobotany and Palynology 146: 51-73.
Lake Ruskowiejskie	53.95	21.3117	144	Poland	CON	lake	micro	N	CLAM, Giesecke et al. (2014)	M. Szal	Szal, M. et al. 2017. Was it ‘terra desolata’? Conquering and colonizing the medieval Prussian wilderness in the context of climate change. The Holocene 27: 465-480.
Lake Salet	53.94	21.3224	132	Poland	CON	lake	micro	N	this study, CLAM, smoothed spline model	M. Szal	Szal, M. et al. 2014. The Iron Age in the Mrągowo Lake District, Masuria, NE Poland: the Salęt settlement microregion as an example of long-lasting human impact on vegetation. Vegetatation History and Archaeobotany 23: 419-437.
Lake Suminko	54.18	17.7983	163	Poland	CON	lake	micro	N	this study, CLAM, smoothed spline model	A. Pędziszewska	Pędziszewska et al. 2015. Holocene environmental changes reflected by pollen, diatoms, and geochemistry of annually laminated sediments of Lake Suminko in the Kashubian Lake District (N Poland). Review of Palaeobotany and Palynology 216: 55-75.
Lake Svetinu	56.76	27.1491	97	Latvia	BNE	lake	micro	N	original, CLAM, smoothed spline model	A. Feudean	Feurdean et al. 2017. Broadleaf deciduous forest counterbalanced the direct effect of 732 climate on Holocene fire regime in hemiboreal/boreal region (NE Europe). Quaternary Science Reviews 169: 733 378-390
Lake Ząbinowskie	54.16	17.5515	184	Poland	CON	lake	micro	N	this study, CLAM, smoothed spline model	J. Święta-Musznicka	PhD-thesis Joanna Święta-Musznicka, Gdańsk, 2005 unpublished
Lake_Brazi	45.4	22.9017	1740	Romania	CON	lake	macro	Y	original, CLAM, smoothed spline model	W. Finsinger	Finsinger et al. 2018. Holocene fire-regime changes near the treeline in the Retezat Mts. (southern Carpathians, Romania). Quaternary International https://doi.org/
Lake_Bucura	45.36	22.8742	2040	Romania	CON	lake	macro	Y	original, CLAM, smoothed spline model	I. Vincze	Vincze et al. 2017. Holocene treeline and timberline changes in the South Carpathians (Romania): climatic and anthropogenic drivers on the southern slopes of the Retezat Mountains
Lake_Lia	45.35	22.8768	1910	Romania	CON	lake	macro	Y	original, CLAM, smoothed spline model	W. Finsinger	Finsinger et al. 2018. Holocene fire-regime changes near the treeline in the Retezat Mts. (southern Carpathians, Romania). Quaternary International https://doi.org/
Lake_Oltina	44.14	27.6308	40	Romania	CON	lake	macro	N	original, CLAM, smoothed spline model	A. Diaconu	A. Diaconu and Feurdean A, unpubl.
Lake_Stiol	47.57	24.8136	1670	Romania	CON	lake	macro	Y	original, CLAM, smoothed spline model	G. Florescu	Feurdean et al. 2016. Tree and timberline shifts in the northern Romanian Carpathians during the Holocene and the responses to environmental changes. Quaternary Science Reviews 134: 100–113.
Lake_Stiucii	46.97	23.8997	240	Romania	CON	lake	macro	Y	original, CLAM, smoothed spline model	A. Feurdean	Feurdean et al. 2013. 12,000-Years of fire regime drivers in the lowlands ofTransylvania (Central-Eastern Europe): a data-model approach. Quaternary Science Reviews 81:48–61.
Lanzhot	48.71	16.9506	150	Czechia /Slovakia	CON	bog	micro	N	original, OxCal, linear interpolation	E. Jamrichová	E. Jamrichova, unpubl.
Linje_Mire	53.19	18.2269	90	Poland	CON	poor fen	micro	N	original, OxCal, Bayesian modelling	K. Marcisz	Marcisz et al. 2015. Long-term hydrological dynamics and fire history over the last 2000 years in CE Europe reconstructed from a high-resolution peat archive. Quaternary Science Reviews 112: 138-152.
Litzelsee	47.77	8.9306	407	Germany	ATL	lake	micro	N	CLAM, Giesecke et al. (2014)	M. Rösch / EPD	Rösch, M., and J. Lechterbeck. 2016. Seven Millennia of human impact as reflected in a high resolution pollen profile from the profundal sediments of Litzelsee, Lake Constance region, Germany. Vegetation History and Archaeobotany, 25.
Mindelsee	47.76	9.0231	406	Germany	ATL	lake	micro	N	CLAM, Giesecke et al. (2014)	M. Rösch	Rösch M. 2013. Change of land use during the last two millennia as indicated in the pollen record of a profundal core from Mindelsee, Lake Constance region, southwest Germany. Offa, 69/70:355-370
Miticka_slatina	48.81	18.1081	330	Czechia /Slovakia	CON	bog	micro	N	original, OxCal, linear interpolation	E. Jamrichová	Jamrichová et al., Folia Geobotania (under revision)
Mlaka	45.5	15.1219	150	Slovenia	CON	bog	micro	N	original, BCal, linear interpolation	M. Andric	Andric M. 2007. Holocene vegetation development in Bela krajina (Slovenia) and the imapct of first farmers on the landscape, The Holocene 17: 763-776.
Molhasul_Mare	46.59	22.7642	1224	Romania	CON	bog	macro	N	original, OxCal, linear interpolation	A. Feurdean	Feurdean et al., 2009. Legacy of the past land use changes and management on the ‘natural’ upland forests composition in the Apuseni Natural Park, Romania. The Holocene 19: 1–15.
Molhasul_Mare micro	46.59	22.7642	1224	Romania	CON	bog	macro	N	original, OxCal, linear interpolation	A. Feurdean	Feurdean et al. 2012. Trends in biomass burning in the Carpathian region over the past 15,000 years. Quaternary Science Reviews 45: 111-125.
Mukrza 6	53.6	18.2664	69	Poland	CON	bog	micro	N	this study, CLAM, smoothed spline model	M. Slowinski	Milena Obremska 2006
Na Mahu	45.97	14.5389	290	Slovenia	CON	bog	micro	N	this study, Psimpoll, linear interpolation	M. Andriç	Andric et al. 2008. Late quaternary vegetation and hydrological change at Ljubljansko barje (Slovenia), Palaeogeography, Palaeoclimatology, Palaeoecology 270: 150-165
Norika Graba	46.62	16.0075	240	Slovenia	CON	wet meadow	micro	N	this study, Psimpoll, linear interpolation	M. Andric	Andric M. and Willis K. J. 2003. The phytogeographical regions of Slovenia: a consequence of natural environmental variation or prehistoric human activity? Journal of Ecology 91, 807-821. , Andric M. Prapoƒçe pollen core and vegetetion change in northern Istria, In P. T. Miracle and S. Fornebaher (eds.). Prehistoric herders of northern Istria, The archaeology of Pupiƒáina cave, vol. 1, Zagreb, Ar…
Novoalexandrovskoye	55.12	41.04	113	Russia	BNE	bog	micro	N	original, Bchron, smoothed spline	E Novenko	Novenko et al. 2016. Mid- and Late Holocene vegetation dynamics and fire history in the boreal forest of European Russia: A case study from Meshchera Lowlands. Palaeogeography, Palaeoclimatology, Palaeoecology. DOI: 10.1016/j.palaeo.2016.08.004
Oberderdingen_OSVA	49.04	8.7603	207	Germany	ATL	fen	micro	N	EPD, CLAM, Giesecke et al. (2014)	M. Rösch / EPD	Rösch M. 2005. Zur Vegetationsgeschichte des s√ºdlichen Kraichgaus - Botanische Untersuchungen bei Gro√üvillars, Gemeinde Oberderdingen, Landkreis Karlsruhe. Fundberichte. Aus Baden-W√ºttemberg 28/1:839-370.
Oberderdingen_OSVC	49.04	8.7603	207	Germany	ATL	fen	micro	N	EPD, CLAM, Giesecke et al. (2014)	M. Rösch / EPD	Rösch, M. 2005. Zur Vegetationsgeschichte des s√ºdlichen Kraichgaus - Botanische Untersuchungen bei Gro√üvillars, Gemeinde Oberderdingen, Landkreis Karlsruhe. Fundberichte. Aus Baden-Wüttemberg 28/1:839-370.
Orlovske	48.47	17.0625	183	Czechia /Slovakia	CON	bog	micro	N	original, OxCal, linear interpolation	E. Jamrichová	unpubl.
Parizske1	47.89	18.4614	121	Czechia /Slovakia	CON	bog	micro	N	original, OxCal, linear interpolation	E. Jamrichová	Jamrichova et al. 2014. Early occurrence of oak-dominated forest in the northern part of the Little Hungarian Plain, SW Slovakia. The Holocene 24: 1810-1824.
Parizske2	47.87	18.4653	122	Czechia /Slovakia	CON	bog	micro	N	original, OxCal, linear interpolation	E. Jamrichová	Jamrichová et al. 2017. Human impact on open temperate woodlands during the middle Holocene in Central Europe. Review of Palynology and Palaeobotany 245: 55-68
Petresiunai	55.85	25.7028	107	Lithuania	BNE	lake	micro	N	this study, CLAM, smoothed spline model	M. Stancikaite	Stancikaite et al. 2009. Lateglacial and Early Holocene environmental changes in northeastern Lithuania.Quaternary International, 207:80-92
Poiana_Stiol	47.59	24.8119	1520	Romania	CON	bog	macro	N	original, CLAM, smoothed spline model	G. Florescu	Feurdean et al. 2017. Fire has been an important driver of forest dynamics in the Carpathian Mountains during the Holocene. Forest Ecology and Management 389: 15-26.
Prapoce	45.42	14.1223	480	Croatia	CON	bog	micro	N	original, OxCal, linear interpolation	M. Andric	Andric M. and Willis K. J. 2003. The phytogeographical regions of Slovenia: a consequence of natural environmental variation or prehistoric human activity? Journal of Ecology 91, 807-821. Andric, M. 2006. Prapoce pollen core and Holocene vegetation change in northern Istria. Peludna jezgra iz Prapoca i promjene vegetacije za holocena u sjevernoj Istri. Pages 31–62 in P. T. Miracle and S. Forenbah…
Prášilské jezero	49.06	13.4	1079	Czechia Republic	CON	lake	macro	Y	original, OxCal, Bayesian modelling	V. Carter	Vachel et al. 2018. Holocene-scale fire dynamics of central European temperate spruce beech forests. Quaternary Science Reviews 191: 15-30
Řásná	49.23	49.2273	676	Czechia Republic	CON	bog	micro	N	original, OxCal, Bayesian modelling	P. Kuneš	Szabó et al. 2017. Using historical ecology to reassess the conservation status of coniferous forests in Central Europe. Conservation Biology 31: 150-160.
Recknitztal Freudenbg	54.24	12.5048	1	Germany	CON	bog	micro	N		M. Theuerkauf	Michaelis, D., Joosten, H., 2007. Mire development, relative sea-level change and tectonic movements along the North-East German Baltic Sea coast. Bericht der Römisch-Germanischen Kommission 88: 101-134.
Rojkov	49.15	19.155	472	Czechia /Slovakia	CON	bog	micro	N	original, OxCal, linear interpolation	E. Jamrichová	E. Jamrichova, unpubl.
Romoty	53.8	22.6328	119	Poland	BNE	bog	micro	N	this study, CLAM, smoothed spline model	M. Obremska	Mirosław-Grabowska, J., Zawisza, E. 2014. Late Glacial–early Holocene environmental changes in Charzykowskie Lake (northern Poland) based on oxygen and carbon isotopes and Cladocera data. Quaternary International 328–329: 156-166.
Rouge	57.74	26.9049	108	Estonia	BNE	bog	micro	N	this study, OxCal 4.2.4. varvochronology (661+4020 varves), 5x14C, Pb210/Cs/Am, SFAP, palaeomagnetic correlation	S. Veski	Poska et al. 2008. Using quantitative pollen-based land-cover estimations and a spatial CA_Markov model to reconstruct the development of cultural landscape at Rõuge, South Estonia. Vegetation History and Archaeobotany 17, 527-541. Veski et al. 2004. Cold event at 8200 yr B.P. recorded in annually laminated lake sediments in eastern Europe. Geology 32, 681-684.
Selikhovo	53.23	35.77	209	Russia	BNE	bog	macro	N	original, CLAM, linear interpolation	E Novenko	Novenko et al. 2016. Mid- and late-Holocene vegetation history, climate and human impact in the western Mid-Russian Upland: new data and a regional synthesis. Biodiversity and Conservation. DOI: 10.1007/s10531-016-1051-8
Semenic	45.18	22.0594	1500	Romania	CON	bog	macro	N	EPD, CLAM, Giesecke et al. (2014) Towards mapping the late Quaternary vegetation change of Europe.	EPD	Rösch M, Fischer E. 2000. A radiocarbon dated Holocene pollen profile from the Banat mountains (Southwestern Carpathians, Romania). Flora 195: 277–286.
Sfanta_Ana	46.2	26.6444	900	Romania	CON	lake	macro	N	EPD, CLAM, Giesecke et al. (2014) Towards mapping the late Quaternary vegetation change of Europe.	CGDv3	http://www.paleofire.org/index.php?p=CDA/index&gcd_menu=CDA
Skrzynka 2008	53.81	17.5214	133	Poland	CON	lake	micro	N	this study, CLAM, smoothed spline model	M. Obremska	Apolinarska et al. 2012. Late Weichselian and Holocene palaeoenvironmental changes in northern Poland based on the Lake Skrzynka record. Boreas 41: 292-307
Stazki bog	54.43	18.0844	195	Poland	CON	bog	micro	N	Free gape age modeling	M. Lamentowicz	Galka et al. 2013. Palaeohydrology, fires and vegetation succession in the southern Baltic during the last 7500 years reconstructed from a raised bog based on multi-proxy data. Palaeogeography, Palaeoclimatology, Palaeoecology 370: 209-221.
Steregoiu	47.81	23.5447	800	Romania	CON	bog	micro	N	original, CLAM, smoothed spline	A. Feurdean	Feurdean et al. 2012. Trends in biomass burning in the Carpathian region over the past 15,000 years. Quaternary Science Reviews 45: 111-125.
Straldzha macro	42.6303	26.777	138	Bulgaria	CON	bog	macro	N	original, OxCal, Bayesian modelling	S. Connor	Connor et al. 2013. Environmental conditions in the SE Balkans since the Last Glacial Maximum and their influence on the spread of agriculture into Europe. Quaternary Science Reviews 68: 200-215
Straldzha micro	42.6303	26.777	138	Bulgaria	CON	bog	micro	N	original, OxCal, Bayesian modelling	S. Connor	Connor et al. 2013. Environmental conditions in the SE Balkans since the Last Glacial Maximum and their influence on the spread of agriculture into Europe. Quaternary Science Reviews 68: 200-215
Studencheskoe	55.27	40.2014	124	Russia	BNE	bog	macro	N	original, CLAM, linear interpolation	D. Kuprijanov	E Novenko, unpublished
Suchar IV	54.09	23.0247	143	Poland	BNE	lake	micro	N	this study, CLAM, smoothed spline model	M. Obremska	Edyta Zawisza, Milena Obremska et al in prep
Szarlo hat	47.9	21.3	86	Hungary	CON	bog	micro	N	original, OxCal, Bayesian modelling	A Feurdean	Magyari et al. 2010. Holocene persistence of wooded steppe in the Great Hungarian Plain. Journal of Biogeography 37: 915–935. Feurdean et al. 2012. Trends in biomass burning in the Carpathian region over the past 15,000 years. Quaternary Science Reviews 45: 111-125
Tajga	50.03	12.6804	817	Czechia /Slovakia	CON	bog	macro	Y	original, CLAM, smoothed spline model	P. Bobek	P. Bobek, unpubl.
Taul_Muced	47.57	24.5449	1340	Romania	CON	bog	macro	Y	original, CLAM, smothed spline model	A Feurdean	Feurdean et al. 2017. Fire has been an important driver of forest dynamics in the Carpathian Mountains during the Holocene. Forest Ecology and Management 389: 15-26.
Tiefer See Klocksin	53.59	12.5295	62	Germany	CON	lake	micro	N	original, varve chronology, 1 tephra and pollen stratigraphy	M. Theuerkauf	Dräger et al. 2017. Varve microfacies and varve preservation record of climate change and human impact for the last 6000 years at Lake Tiefer See (NE Germany). The Holocene 27: 450-464
Treppelsee	52.14	14.4528	52	Germany	CON	lake	micro	N	EPD, CLAM, Giesecke et al. (2014)	T. Giesecke	Giesecke T. 2000. Pollenanalytische und sedimentchemische Untersuchungen zur nat√ºrlichen und anthropogenen Geschichte im Schlaubetal. Sitzungsberichte der Gesellschaft Naturforschender Freunde zu Berlin, 39 (2000), pp. 89-112.
Vapsko	42.07	23.5245	2160	Bulgaria	CON	bog	macro	Y	original, CLAM, smoothed spline model	A. Panait & A. Feurdean	A. Feurdean, unpublished
Verijarv	57.81	27.055	90	Estonia	BNE	lake	micro	N	this study, OxCal 4.2.4, IntCal13	S. Veski	Niinemets, E., Saarse, L. 2006. Holocene forest dynamics and human impact in southeastern Estonia. Vegetation History and Archaeobotany 16: 1-13.
Viitna Pikkjärv	59.45	26.0103	75	Estonia	BNE	lake	micro	N	this study, OxCal 4.2.4, IntCal13	S. Veski	Saarse et al. 1999. Holocene environmental events in the Viitna area, North Estonia. Proceedings of the Estonian Academy of Sciences, Geology 47: 31-44.
Wangen_Bodensee	47.67	8.9333	395	Germany	ATL	lake	micro	N	EPD, CLAM, Giesecke et al. (2014)	M. Rösch / EPD	Rösch, M. 2000. Long-term human impact as registered in an upland pollen profile from the southern Black Forest, southwestern Germany. Vegetation History and Archaeobotany 9:205-218
Wilder_See	48.57	8.2369	910	Germany	ATL	lake	micro	N	EPD, CLAM, Giesecke et al. (2014)	M. Rösch / EPD	Rösch, M. 2009. Zur vorgeschichtlichen Besiedlung und Landnutzung im nördlichen Schwarzwald aufgrund vegetationsgeschichtlicher Untersuchungen in zwei Karseen. [Prehistoric settlement and land use history of the Northern Black Forest as indicated by pollenanalytical investigations in two cirque lakes] Mitt. Ver. Forstl. Standortskunde u. Forstpflanzenzüchtung 46(2009):69-80. Rösch, M. 2007. Botan…
Wildseemoor	48.72	8.4589	909	Germany	ATL	bog	micro	N	EPD, CLAM, Giesecke et al. (2014)	M. Rösch / EPD	Rösch, M. 2007. Botanical evidence for prehistoric and medieval land use in Black Forest. Medieval Rural Settlement in Marginal Landscapes. Ruralia VII, 8th-14th September 2007 Cardiff Wales, U.K.,335-343.
Zadeikiai Bog	56.17	21.98	120	Lithuania	BNE	bog	micro	N	this study, CLAM, smoothed spline model	GCDv3	http://www.paleofire.org/index.php?p=CDA/index&gcd_menu=CDA
EPD=European Pollen Database
